# Supplementary material for: CRISPR/Cas9-mediated multiple gene editing in Brassica oleracea var. capitata using the endogenous tRNA-processing system
Source: PubMed Central journal article supplement (PMC6355899; doi:10.1038/s41438-018-0107-1), 2019-02-01
Supplement: 41438_2018_107_MOESM1_ESM.pdf [file 41438_2018_107_MOESM1_ESM.pdf]

775 **Corresponding author**

776 Correspondence to Hongyuan Song and Xuesong Ren

777

778 **Supplementary Table 1 Primers used in this study.**

| Primer name | Sequence (5'-3')          | Purpose                                   |
|-------------|---------------------------|-------------------------------------------|
| SgSRK-1F    | TGCAGGCAATAATCTTGTCTCTCT  | <i>BoSRK3</i> gene target site assembly   |
| SgSRK-1R    | AAACAGGAGGACAAGATTATTGCC  |                                           |
| SgSRK-2F    | TGCAGTGGCAGAGCTTCTCGCCAA  |                                           |
| SgSRK-2R    | AAACTTGGCGAGAAGCTCTGCCAC  |                                           |
| SgSRK-3F    | TGCAGTGGGATCTTTAGAGTGCAT  |                                           |
| SgSRK-3R    | AAACATGCACTCTAAAGATCCCAC  |                                           |
| SgSRK-4F    | TGCAAACCCTATATCCAACCTCCAC |                                           |
| SgSRK-4R    | AAACGTGGAGTTGGATATAGGGTT  |                                           |
| BoSRK3-F    | GACATTGTCCGACAGAACCTATG   | PCR of the <i>BoSRK3</i> genomic sequence |
| BoSRK3-R    | CTTCACTATTATCTGTGAAATTG   |                                           |
| BoSLG3-F    | ACGATAATTCTTACACCTCCTGTT  | PCR of the <i>BoSLG3</i> genomic sequence |
| BoSLG3-R    | TCTTCTAGTATGCCACTATATCGT  |                                           |
| SgPDS-1F    | GATTGCAAAGTACCTGGCTGATGC  | <i>BoPDS</i> gene target site assembly    |
| SgPDS-1R    | AAACGCATCAGCCAGGTACTTTGC  |                                           |
| SgPDS-2F    | GATTGAAGCAAGAGATGTTCTTGG  |                                           |
| SgPDS-2R    | AAACCCAAGAACATCTCTTGCTTC  |                                           |
| SgPDS-3F    | GATTGAAACAACGAGATGCTGACA  |                                           |
| SgPDS-3R    | AAACTGTCAGCATCTCGTTGTTTC  |                                           |
| SgPDS-4F    | GATTACCTGATCGCGTGACTGATG  |                                           |
| SgPDS-4R    | AAACCATCAGTCACGCGATCAGGT  |                                           |
| SgMS1-1F    | GATTGCCTTTCTAAAAGTAGAAGG  | <i>BoMS1</i> gene target site assembly    |
| SgMS1-1R    | AAACCTTCTAGTTTTAGAAAGGC   |                                           |
| SgMS1-2F    | GATTGAGTAGCAAAAAGGAGAGCCG |                                           |
| SgMS1-2R    | AAACCGGCTCTCCTTTTGCTACTC  |                                           |
| SgMS1-3F    | GATTGAGGTTAAGAGAGGCTTCGA  |                                           |
| SgMS1-3R    | AAACTCGAAGCCTCTCTTAACCTC  |                                           |

|             |                          |                                                                              |
|-------------|--------------------------|------------------------------------------------------------------------------|
| SgMS1-4F    | GATTAAGTTGGTCCTTTCAGCTCG |                                                                              |
| SgMS1-4R    | AAACCGAGCTGAAAGGACCAACTT |                                                                              |
| BoMS1-F1    | TGTCGAATCTGATTCGAACAGATC | PCR of the <i>BoMS1</i> genomic sequence (site D, site C and site A regions) |
| BoMS1-R1    | AAGGACATGGCCTTGAAGTTCCAC |                                                                              |
| BoMS1-F2    | CATGGTTGAGAGCAATTTCAACC  | PCR of the <i>BoMS1</i> genomic sequence (site B region)                     |
| BoMS1-R2    | AGTTGGTACTATCAATGGAGATG  |                                                                              |
| BoPDS-F1    | AGACAAGAACAAGGCGAAGGACT  | PCR of the <i>BoPDS</i> genomic sequence                                     |
| BoPDS-R1    | CCGGTTTCATACCAATCTCCATC  |                                                                              |
| BoPDS-F2    | ATGTTCTACCAGCACCCTTAAAC  |                                                                              |
| BoPDS-R2    | AGGTACTCCCTGGAAATGAACAC  |                                                                              |
| BoPDS-R3    | AGTTATTGGAGTGCCCAAACCTG  |                                                                              |
| BoPDS-F     | CCTTTTATTCATTATGCTACCCAG |                                                                              |
| BoPDS-R     | GAGAAGTGAGCATGCTTTAGTGGT |                                                                              |
| Bol016089-F | TGGTGAAGCTCCTTTGCCTCTCG  | PCR of the <i>Bol016089</i> genomic sequence                                 |
| Bol016089-R | TAAGAACGCCATCTTCGACCCAT  |                                                                              |
| Cas9-F      | CAAGTACGTGAACTTCTCTACC   | Detection of the transgenic plants                                           |
| Cas9-R      | GCTGGGAAAGGTCGATACGAGTC  |                                                                              |

779

780

781

**Supplementary Table 2 Transmission of Cas9/gRNA-induced mutations in the F1 progeny of C-4 × WT ('+': positive; '-': negative)**

| F1 line | Cas9 | Site D of the <i>BoMS1</i> gene |                        |    | Site B of the <i>BoSRK3</i> gene |
|---------|------|---------------------------------|------------------------|----|----------------------------------|
|         |      | T nucleotide deletion           | T nucleotide insertion | WT | A nucleotide insertion           |
| 1       | +    | +                               | -                      | -  | +                                |
| 2       | +    | +                               | -                      | -  | +                                |
| 3       | -    | -                               | -                      | +  | +                                |
| 4       | +    | +                               | -                      | -  | +                                |
| 5       | +    | +                               | -                      | -  | +                                |
| 6       | -    | +                               | -                      | -  | +                                |
| 7       | +    | +                               | -                      | -  | +                                |
| 8       | +    | -                               | +                      | -  | +                                |
| 9       | -    | +                               | -                      | -  | -                                |
| 10      | -    | +                               | -                      | -  | +                                |
| 11      | -    | +                               | -                      | -  | +                                |
| 12      | +    | -                               | +                      | -  | +                                |
| 13      | -    | +                               | -                      | -  | -                                |
| 14      | -    | +                               | -                      | -  | +                                |
| 15      | +    | +                               | -                      | -  | -                                |
| 16      | -    | +                               | -                      | -  | -                                |

|    |   |   |   |   |   |
|----|---|---|---|---|---|
| 17 | - | + | - | - | - |
| 18 | - | + | - | - | - |
| 19 | + | + | - | - | - |
| 20 | - | - | + | - | - |

782 **Supplementary Figure 1 Detection of a large fragment deletion in *BoPDS* and *BoSRK3* and their paralogous**  
783 **genes. (A)** No fragment deletion in the *BoPDS* gene was detected in any *BoPDS* gene mutant plants using the  
784 primers BoPDS-F and BoPDS-R (see Supplementary Table 1). **(B)** No fragment deletion in the *Bol016089* gene  
785 was detected in any *BoPDS* gene mutant plants using the primers Bol016089-F and Bol016089-R (see  
786 Supplementary Table 1). **(C)** No fragment deletion of the *BoSRK3* gene was detected in any *BoSRK3* gene mutant  
787 plants using the primers BoSRK3-F and BoSRK3-R (see Supplementary Table 1).

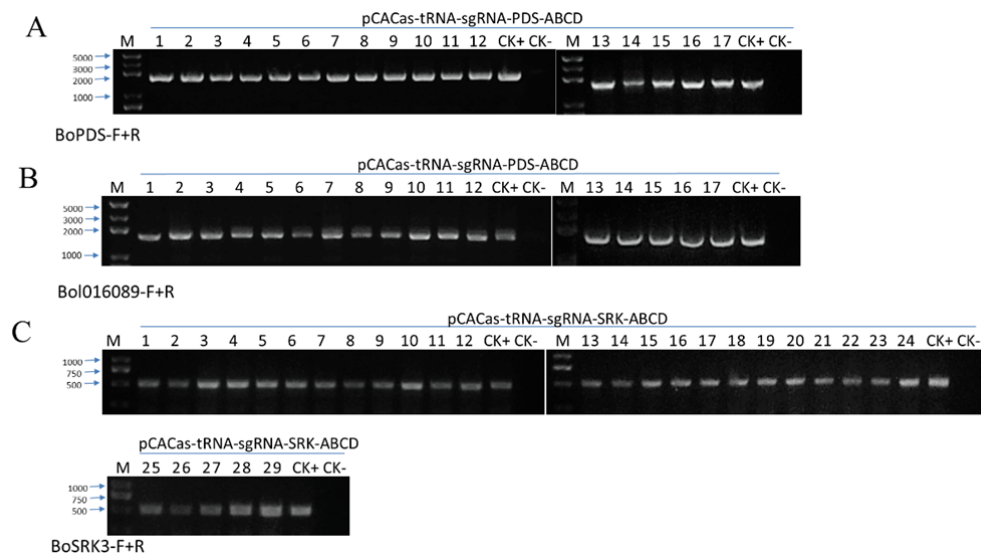

788 **Supplementary Figure 2 Self-pollination of fertile T0 plants with the *BoSRK3* gene mutation without artificial or**  
789 **natural pollination. (A)** Siliques of the B-2 line. **(B)** Siliques of the B-1 line.  
790

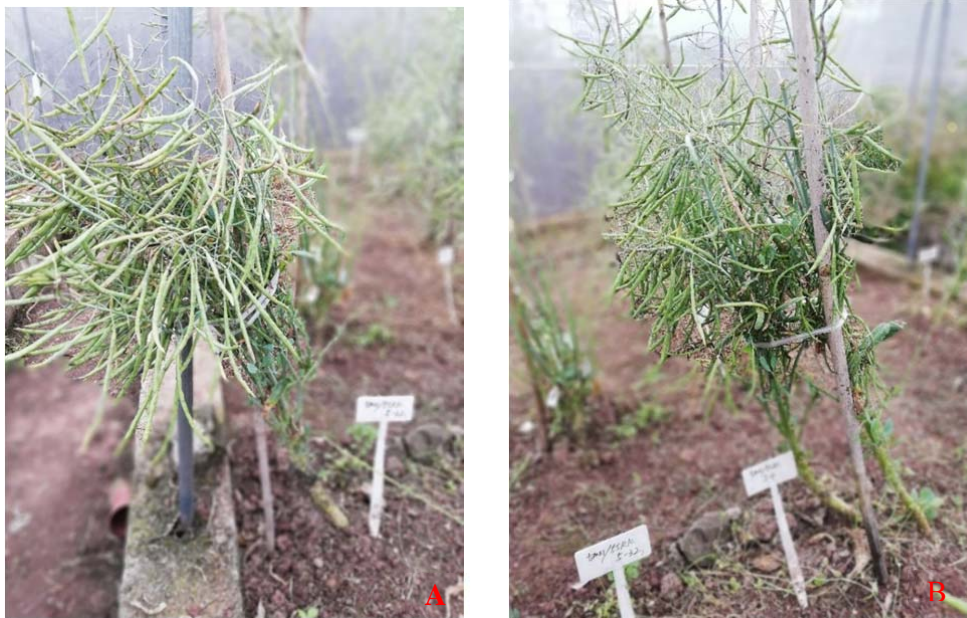

791

792 **Supplementary Figure 3. Examples of sequencing chromatograms of the T1 and F1 progeny with**

793 **Cas9-induced mutations. (A)** A homozygote of the site A mutation (**A1**) and a heterozygote of the site B mutation

794 (**A2**) in the *BoSRK3* gene were detected in the T1 progeny of the B-1 line; New mutations at site B were detected

795 in the T1 generation of the line B-1 (**A3**). (**B**) The ‘T’ nucleotide deletion mutation (**B1**) and the ‘T’ nucleotide

796 insertion mutation (**B2**) detected at the D site of the *BoMS1* gene in the T0 generation (C-4 line) was inherited to

797 the F1 progeny of the C-4 × WT; The ‘A’ nucleotide insertion mutation detected at site B of the *BoSRK3* gene in

798 the T0 generation (C-4 line) was inherited in the F1 progeny of the C-4 × WT (**B3**).

799 **A**

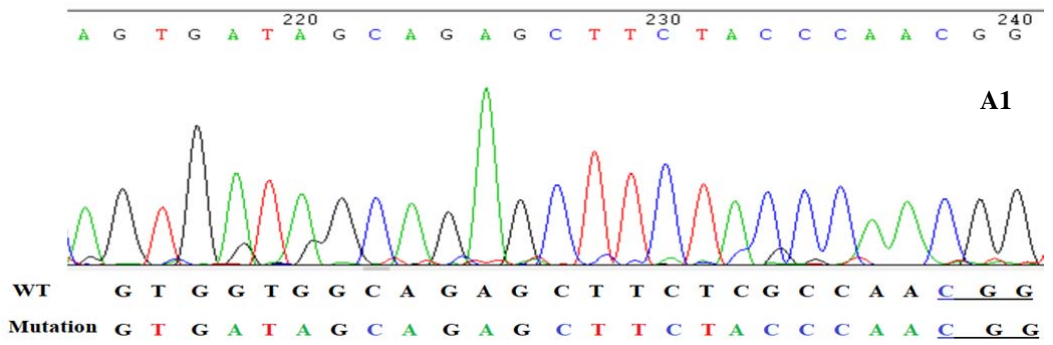

800

G A T A A C C C <sup>100</sup> T C T C T C C A A <sup>110</sup> T T C C A T T G G A A C <sup>120</sup>  
**A2**

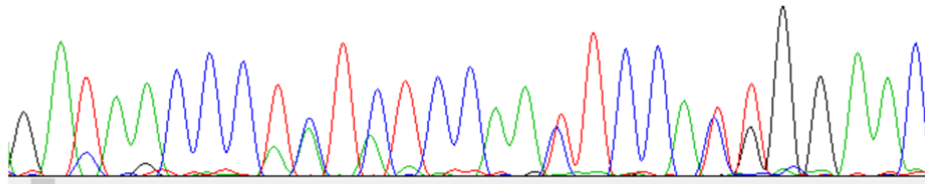

801 **WT** G A T A A C C C T A T A T C C A A C T C C A C T G G A A C  
**Mutation** G A T A A C C C T C T C T C C A A T T C C A T G G G A A C

A A C C C C <sup>100</sup> T C T C T C C A A T <sup>110</sup> T T C C A T T G G A A C C C <sup>120</sup>  
**A3**

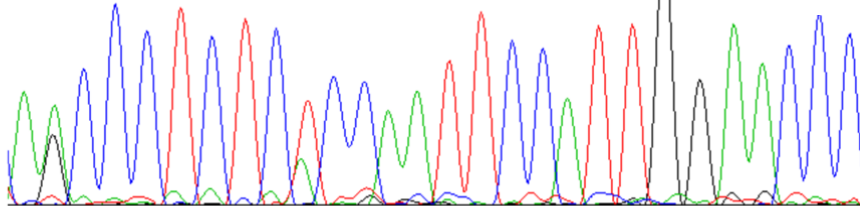

802 **Parental mutation** A A C C C T C T C T C C A A T T C C A T T G G  
**New mutation** A G C C C T C T C A C C A A T T C C A T T G G  
**WT** A A C C C T A T A T C C A A C T C C A C T G G

803 **B**

T G G G <sup>150</sup> A A G T T G G T C C <sup>160</sup> T T T C A G C C C <sup>170</sup> A G G G T C C T C C <sup>180</sup> T C C C C  
**B1**

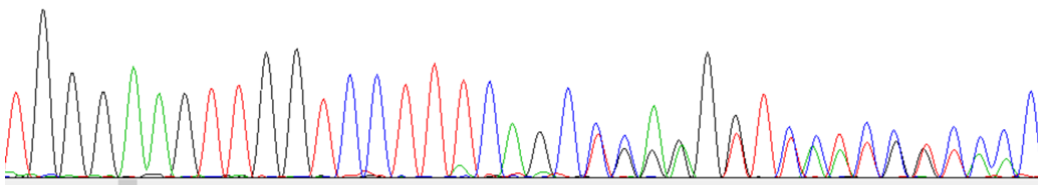

804 **WT** A A G T T G G T C C T T T C A G C T C G A G G T T C A T C G T C  
**Mutation** A A G T T G G T C C T T T C A G C C G A G G T T C A T C G T C  
↑  
**T deletion**

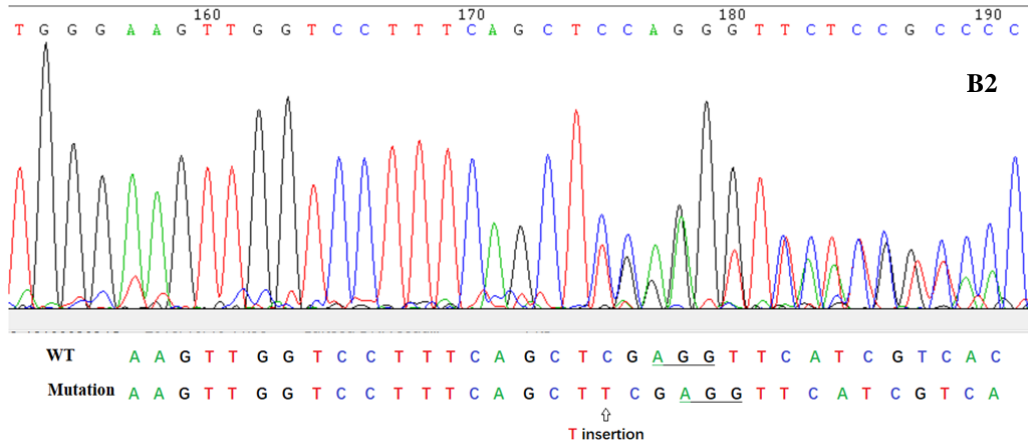

805

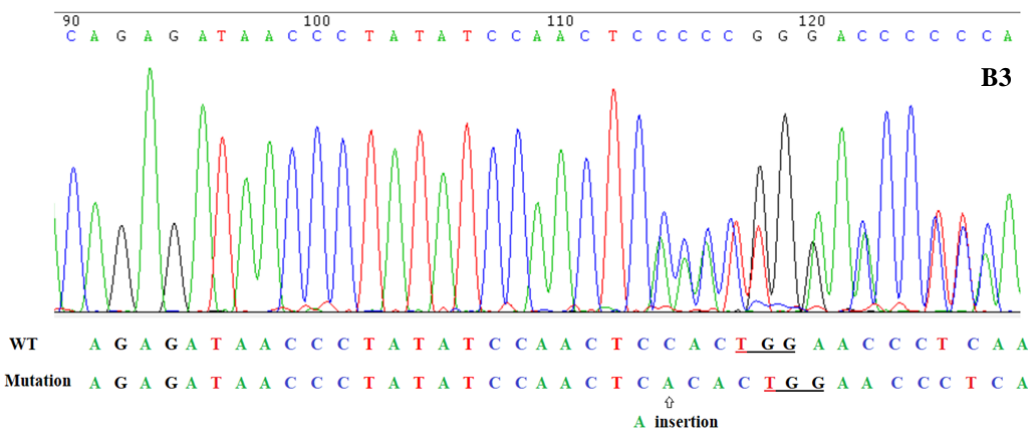

806

807 **Supplementary data sheet**

808 **1. Sequence of tandemly arrayed tRNA-gRNA architecture with the *AtU6-26* promoter.** The red sequence

809 represents the *AtU6-26* promoter that drives the tRNA-sgRNA. The green sequence represents *A. thaliana*

810 glycine-tRNA. The blue sequence represents the *BbsI*, *BsaI*, *BsmBI*, and *BfuAI* restriction sites. The yellow

811 sequence represents the optimized sgRNA scaffold. The orange sequence represents the terminator. The

812 lowercase letters represent the *BamHI* and *EcoRI* restriction sites.

813 >AtU6-26::tRNA-sgRNA

814 ggatccCGTTGAACAACGGAAACTCGACTTGCCTTCGCACAATACATCATTCTTCTTA

815 GCTTTTTTCTTCTTCTTCGTTTCATACAGTTTTTTTTTGTTTATCAGCTTACATTTCTTG

816 AACCGTAGCTTTCGTTTTCTTCTTTTAACTTCCATTTCGGAGTTTTGTATCTTGTTTC

817 ATAGTTTGTCCAGGATTAGAATGATTAGGCATCGAACCTTCAAGAATTTGATTGAAT

818 AAAACATCTTCATTCTTAAGATATGAAGATAATCTTCAAAGGCCCTGGGAATCTGA

819 AAGAAGAGAAGCAGGCCATTTATATGGGAAAGAACAATAGTATTTCTTATATAGGC

820 CCATTTAAGTTGAAAACAATCTTCAAAGTCCACATCGCTTAGATAAGAAAACGAA

821 GCTGAGTTTATATACAGCTAGAGTCGAAGTAGTGATTGAACAAAGCACCAGTGGTCT

822 AGTGGTAGAATAGTACCCTGCCACGGTACAGACCCGGGTTTCGATTCCCGGCTGGTGC

823 AGGGTCTTCGTTACAGAAGACCTGTTTCAGAGCTATGCTGGAAACAGCATAGCAAG

824 TTGAAATAAGGCTAGTCCGTTATCAACTTGAAAAAGTGGCACCGAGTCGGTGCAACAA  
 825 AGCACCAGTGGTCTAGTGGTAGAATAGTACCCTGCCACGGTACAGACCCGGGTTCTGA  
 826 TTCCCGGCTGGTGCAAGAGACCCTGCAGGGTCTCTGTTTCAGAGCTATGCTGGAAAC  
 827 AGCATAGCAAGTTGAAATAAGGCTAGTCCGTTATCAACTTGAAAAAGTGGCACCGAG  
 828 TCGGTGCAACAAAGCACCAGTGGTCTAGTGGTAGAATAGTACCCTGCCACGGTACAG  
 829 ACCCGGGTTCGATTCCCGGCTGGTGCAAGAGACGGTTACACGTCTCTGTTTCAGAG  
 830 CTATGCTGGAAACAGCATAGCAAGTTGAAATAAGGCTAGTCCGTTATCAACTTGAAA  
 831 AAGTGGCACCGAGTCGGTGCAACAAAGCACCAGTGGTCTAGTGGTAGAATAGTACCC  
 832 TGCCACGGTACAGACCCGGGTTTCGATTCCCGGCTGGTGCAAATCGCAGGTGTTACA  
 833 ACCTGCATTCGTTTCAGAGCTATGCTGGAAACAGCATAGCAAGTTGAAATAAGGCTA  
 834 GTCCGTTATCAACTTGAAAAAGTGGCACCGAGTCGGTGCTTTTTTTTTGTCCCTCgaatt  
 835 c

836  
 837 **2. Partial sequence of *BoSRK3* gene covering the target region. The target sites (B, D, A, and**  
 838 **C sites in turn) are highlighted in green.**

839 >BoSRK3  
 840 TTGTATCTCCCGGTGATGTCTTCGAGCTCGGTTTCTTCAAAACCACCTCAAGTTCTCGT  
 841 TGGTATCTCGGTATATGGTACAAGACATTGTCCGACAGAACCTATGTATGGATTGCCAAC  
 842 AGAGATAACCCTATATCCAACTCCACTGGAAACCCTCAAAATCTCAGGCAATAATCTGT  
 843 CCTCCTTGGTGACTCCAATAAACCTGTTTGGTCGACGAATCTAACTAGAAGAAGTGAG  
 844 AGATCTCCAGTGTGGCAGAGCTTCTCGCAA<sub>CGGAAACTTCGTGATGCGAGACTCCA</sub>  
 845 ACAACAACGATGCAAGTCAATTTTATGGCAAAGTTTCGATTACCCTACAGATACTTG  
 846 CTCCTGACATGAAACTGGGTTACGACCTAAAAACAGGGCTGGACAGATTCTTACAT  
 847 CATGGAGAAGTTTAGATGATCCGTCAGCGGAATTTCTCGTACAGGCTCGAAACCCG  
 848 AAAGTTTCTGAATTTATTTAAGGAGTGGGATCTTAGAGTGCAI<sub>CGGAGTGGTCCAT</sub>  
 849 GGAATGGAATCCGATTTAGTGGCATAACCAGATGACCAAAAAGTTGAGTTACATGGTTTAC  
 850 AATTCACAGATAATAGTGAAGAAGTCGCTTATACATTCCGAATGACCAACAACAGCAT  
 851 TTA<sub>CTCGAGACTGACAGTAAGTTTCTTAGGGCATT</sub>TGAAACGTCAGACGTGGAATCCGT  
 852 CATTAGGGATGTGGAACGCGTTCTGGTCTTTTATATTGGACTCACAGTGCGATATATACA  
 853

854 **3. Partial sequence of the *BoSLG3* gene covered the target region. The putative target sites**  
 855 **(B, D, A, C sites in turn) are highlighted in green**

856 >BoSLG3  
 857 ATGAAAGGCATAAGAAAAACCTACGATAATTCTTACACCTCCTGTTTGCTTGTCTTTTTC  
 858 GTCTTAATTCTATTTCCGCTTGCCTTTTCGATCAACACTTTGTCGTCTACAGAACTCTCT  
 859 ACAATCTCAAGCAACAGAACACTCGTATCTCCATGTAGTAACTTCGAGCTCGGCTTCTT

860 CAGAACCAACTCAAGTTCTCGTTGGTATCTCGGGATATGGTACAAGAAATTGTCTAACA  
861 GAACCTATGTATGGGTTGCCAACAGAGATAACCCTTTGTCCAACCTCATTGGAACCCTC  
862 AAAATCTCAGGCAATAATCTTGTCCTCCTTGGTCACTCCAATAGATCAGTTTGGTTCGAC  
863 GAATCTTACTAGAGAAAATGAGAGATCCACAGTGGTCGCAGAGCTTCTCGCTAAIGGA  
864 AACTTCGTGATGCGAGACGCAAGTGGATTCTTGTGGCAAAGTTTCGATTACCCTACAG  
865 ATACTTTGCTACCAGAGATGAAACTGGGTTACGACCTCAAAACAGGGCTGAACAGGTT  
866 CCTTACATCATGGAGAAGTTCAGATGATCCATCAAGCGGGGATTTCTCGTACAAGCTCG  
867 AAACCCGAAGGCTTCCTGAATTTTATATATCGAGTGGGGTCTTTCTATTGTATCGGAGTG  
868 GACCATGGAATGGAATACGATATAGTGGCATACTAGAAGACCAAAGTTGAATTACATG  
869 GTGTACAATTTACAGAGAATAGTGAAGAAGTCGCTTATACATTCCGAATGACCAACA  
870 ACAGCATCTACTCGAGACTGACACTAAGTTTCTCGGGGTATTTGAACGACAGACGTG
